# Supplementary material for: Manipulating matrix stacking modes for ultralong-duration organic room-temperature phosphorescence in trace isomer doping systems
Source: Royal Society of Chemistry journal article supplement (doi:10.1039/d1tc01744f), 2021-01-01
Supplement: d1tc01744f1.pdf [file d1tc01744f1.pdf]

## Supporting Information

### Manipulating Matrix Stacking Modes for Ultralong Organic Room Temperature Phosphorescence in Trace Isomer Doping Systems

Shou Yuan,<sup>‡a</sup> QiKun Sun,<sup>‡a</sup> Yaguang Wang,<sup>a</sup> Lingtai Yue,<sup>a</sup> Jie Ma,<sup>a</sup> Yuefa Zhang,<sup>a</sup> Haichang Zhang,<sup>a</sup> Shanfeng Xue\*<sup>a</sup> and Wenjun Yang\*<sup>a</sup>

Key Laboratory of Rubber-plastics of Ministry of Education/Shandong Province (QUST), School of Polymer Science & Engineering, Qingdao University of Science & Technology, 53-Zhengzhou Road, Qingdao, 266042, P. R. China. E-mail: ywjph2004@qust.edu.cn, sfxue@qust.edu.cn.

#### General method

<sup>1</sup>H and <sup>13</sup>C NMR spectra were recorded on a Bruker AC500 spectrometer at 500 MHz and 125 MHz, respectively, using deuterated chloroform or deuterated dimethyl sulfoxide as the solvent and tetramethylsilane (TMS) as the internal standard. Photo-luminescence spectra were recorded on a Hitachi F-4600 spectrophotometer. Time-resolved decay curves were recorded by a Hamamatsu compact fluorescence lifetime spectrometer (FLS-1000). The lifetimes ( $\tau$ ) of the luminescence were obtained by fitting the decay curve with a multi-exponential decay function of

$$R(t) = \sum_i B_i e^{-\frac{t}{\tau_i}} \quad (S1)$$

where  $B_i$  and  $\tau_i$  represent the amplitudes and lifetimes of the individual components for multi-exponential decay profiles, respectively. The digital photographs were captured by the FDR-AX700 4K HDR digital cameras (SONY, Japan). Absolute PL quantum yields (PLQY) were determined with a spectrometer C11347 (Hamamatsu, Japan). Elemental analysis was characterized using a Flash EA 1112 instrument. Photoluminescence spectra and photographs at 78 K were performed on a QE Pro spectrometer with a CCD array (Ocean Optics) as a power detector and 365 nm lamp as excitation light. The RTP yields were generally obtained by peak-differentiation-imitating analysis from the corresponding steady-state and transient PL spectra and the absolute total quantum yield ( $\Phi_p$ ). By peak-differentiation-imitating analysis, the RTP ratio can be identified, and from, both fluorescent and RTP yields can be figured out. As illustrated in Equation S2,  $\Phi_p$  is obtained by photon counting from the excitation source into an integration sphere with the ratio of photons emitted:

$$\Phi = \frac{N^{em}}{N^{abs}} \quad (S2)$$

In this equation,  $N^{em}$  is the number of emitted photons and  $N^{abs}$  is the number of absorbed photons.

#### Synthesis and Characterization

**Scheme 1.** The synthetic route of P34N and P34M.

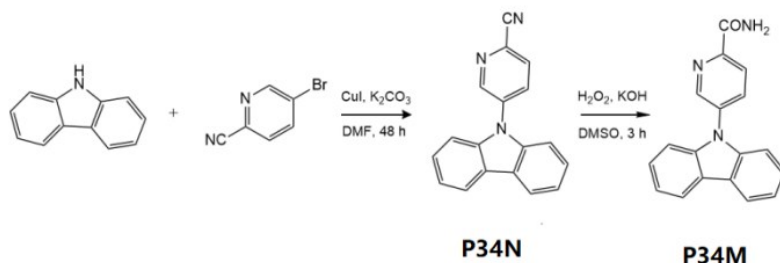

(9*H*-carbazol-9-yl)isonicotinonitrile (P34N).

A mixture of K<sub>2</sub>CO<sub>3</sub> (0.75 g, 5.46 mmol), 9*H*-carbazole (0.91 g, 5.45 mmol), 3-bromoisonicotinonitrile (1.0 g, 5.46 mmol) and 1,10-phenanthroline monohydrate (0.06 g, 0.55 mmol) in DMF (30 mL) was stirred at room temperature. CuI (0.4 g, 1.10 mmol) was added to the mixture and stirred at 128 °C for 48 h. After cooling to room temperature, the reaction mixture was extracted with dichloromethane. The combined organic layer was dried with anhydrous MgSO<sub>4</sub>, and filtered and concentrated in vacuo. The crude product was purified by silica-gel column chromatography using petroleum ether/dichloromethane (1:1, v/v), yielding a yellow-green solid (0.45 g, yield 28.4 %). <sup>1</sup>H NMR (500 MHz, CDCl<sub>3</sub>): δ 9.05 (d, *J* = 2.5 Hz, 1H), 8.23–8.05 (m, 3H), 7.96 (d, *J* = 8.3 Hz, 1H), 7.53–7.40 (m, 4H), 7.37 (ddd, *J* = 8.0, 5.8, 2.3 Hz, 2H). <sup>13</sup>C NMR (126 MHz, CDCl<sub>3</sub>): δ 148.55, 139.11, 137.29, 133.46, 130.59, 128.88, 126.21, 123.85, 121.18, 120.30, 116.41, 108.62. Anal. Calcd. For C<sub>18</sub>H<sub>11</sub>N<sub>3</sub>: C, 80.28; H, 4.12; N, 15.60. Found: C, 80.33; H, 4.09; N, 15.58.

3-(9*H*-carbazol-9-yl)isonicotinamide (P34M).

A mixture of 3-(9*H*-carbazol-9-yl)isonicotinonitrile (0.4 g, 1.50 mmol), 30 % H<sub>2</sub>O<sub>2</sub> (1.25 g, 37.5 mmol), KOH (0.74 g, 18.5 mmol), and DMSO (30 mL) was stirred for 3 h at 40 °C. After cooling to room temperature, the mixture was extracted with dichloromethane, and the combined organic layer was dried with anhydrous MgSO<sub>4</sub> and filtered and then concentrated in vacuo. The crude product was purified by silica-gel column chromatography using dichloromethane as the eluent to give the compound as a white solid (0.4 g, yield 90 %). <sup>1</sup>H NMR (500 MHz, DMSO-*d*<sub>6</sub>): δ 8.94 (d, *J* = 2.3 Hz, 1H), 8.40–8.18 (m, 5H), 7.83 (s, 1H), 7.46 (dd, *J* = 6.1, 1.4 Hz, 4H), 7.33 (ddd, *J* = 7.9, 6.1, 2.0 Hz, 2H). <sup>13</sup>C NMR (126 MHz, DMSO-*d*<sub>6</sub>): δ 165.39, 148.78, 146.24, 139.72, 135.97, 135.41, 126.55, 123.37, 123.16, 120.78, 120.63, 109.56. Anal. Calcd. For C<sub>18</sub>H<sub>11</sub>N<sub>3</sub>O: C, 75.25; H, 4.56; N, 14.63. Found: C, 75.30; H, 4.52; N, 14.65.

**Scheme 2. The synthetic route of P35N and P35M.**

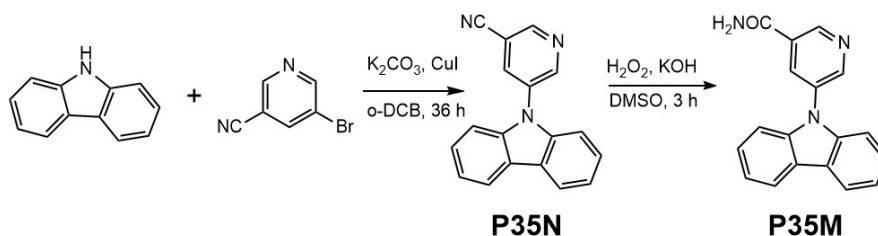

5-(9*H*-carbazol-9-yl)nicotinonitrile (P35N).

A mixture of 9*H*-carbazole (1.0 g, 6.00 mmol), 3-bromo-5-fluoropyridine (1.2 g, 6.56 mmol), copper powder (0.25 g, 3.94 mmol), K<sub>2</sub>CO<sub>3</sub> (3.31 g, 24.0 mmol), and 18-crown-6 (0.53 g, 1.97 mmol) in *o*-dichlorobenzene (40 mL) was stirred and refluxed for 36 h. The excessive *o*-dichlorobenzene was removed under reduced pressure. The crude product was purified by silica-gel column chromatography using dichloromethane as the eluent to give the white compound (0.35 g, yield 19.4 %). <sup>1</sup>H NMR (500 MHz, CDCl<sub>3</sub>): δ 9.13 (d, *J* = 2.5 Hz, 1H), 8.96 (d, *J* = 1.8 Hz, 1H), 8.22 (t, *J* = 2.2 Hz, 1H), 8.16 (dd, *J* = 7.7, 1.3 Hz, 2H), 7.47 (ddd, *J* = 8.3, 6.9, 1.3 Hz), 7.41–7.32 (m, 4H). <sup>13</sup>C NMR (126 MHz, CDCl<sub>3</sub>): δ 151.71, 150.23, 139.92, 136.65, 135.01, 126.70, 124.14, 121.51, 120.81, 115.67, 111.01, 108.90. Anal. Calcd. For C<sub>18</sub>H<sub>11</sub>N<sub>3</sub>: C, 80.28; H, 4.12; N, 15.60. Found: C, 80.29; H, 4.09; N, 15.62.

5-(9*H*-carbazol-9-yl)nicotinamide (P35M).

A mixture of 5-(9*H*-carbazol-9-yl)nicotinonitrile (0.4 g, 1.50 mmol), 30 % H<sub>2</sub>O<sub>2</sub> (1.25 g, 37.5 mmol), KOH (0.74 g, 18.5 mmol), and DMSO (30 mL) was stirred for 3 h at 40 °C. After cooling to room temperature, the mixture was extracted with dichloromethane. The combined organic layer was dried with anhydrous MgSO<sub>4</sub>, and filtered and concentrated in vacuo. The crude product was purified by silica-gel column chromatography using dichloromethane as the eluent to give the compound as a white solid (0.4 g, yield 90 %). <sup>1</sup>H NMR (500 MHz, DMSO-*d*<sub>6</sub>): δ 9.23 (t, *J* = 1.5 Hz, 1H), 9.13–9.05 (m, 1H), 8.54 (q, *J* = 2.1, 1.6 Hz, 1H), 8.41–8.26 (m, 3H), 7.84 (s, 1H), 7.57–7.43 (m, 4H), 7.43–7.33 (m, 2H). <sup>13</sup>C NMR (126 MHz, DMSO-*d*<sub>6</sub>): δ 165.51, 150.09, 147.65, 140.00, 133.49, 133.08, 130.87, 126.50, 123.02, 120.60, 109.51. Anal. Calcd. For C<sub>18</sub>H<sub>11</sub>N<sub>3</sub>O: C, 75.25; H, 4.56; N, 14.63. Found: C, 75.32; H, 4.49; N, 14.61.

**Scheme 3. The synthetic route of P24N and P24M.**

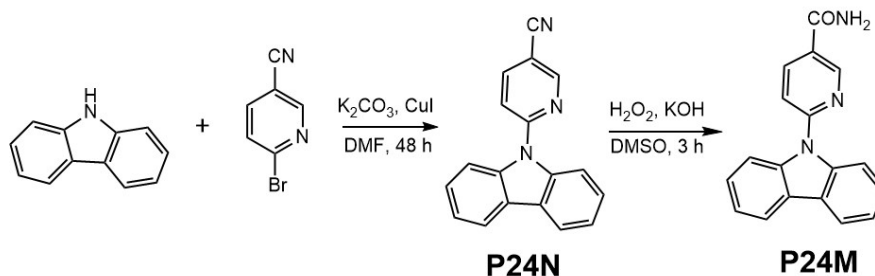

**6-(9H-carbazol-9-yl)nicotinonitrile (P24N).**

A mixture of  $K_2CO_3$  (0.75 g, 5.46 mmol), 9H-carbazole (0.91 g, 5.45 mmol), 2-bromo-5-fluoropyridine (1.0 g, 5.46 mmol) and 1,10-phenanthroline monohydrate (0.06 g, 0.55 mmol) in DMF (30 mL) was stirred at room temperature.  $CuI$  (0.4 g, 1.10 mmol) was added to the mixture and stirred at 128 °C for 48 h. After cooling to room temperature, the reaction mixture was extracted with dichloromethane. The combined organic layer was dried with anhydrous  $MgSO_4$ , and filtered and concentrated in vacuo. The crude product was purified by silica-gel column chromatography using petroleum ether/dichloromethane (1:1, v/v), yielding a white solid (0.3 g, yield 18.7 %).  $^1H$  NMR (500 MHz, Chloroform-d)  $\delta$  8.98 (d,  $J = 2.3$  Hz, 1H), 8.21–8.06 (m, 3H), 7.98 (d,  $J = 8.3$  Hz, 2H), 7.82 (d,  $J = 8.5$  Hz, 1H), 7.48 (t,  $J = 7.7$  Hz, 2H), 7.38 (t,  $J = 7.5$  Hz, 2H).  $^{13}C$  NMR (126 MHz,  $CDCl_3$ ):  $\delta$  154.07, 152.26, 140.72, 138.26, 126.22, 124.75, 121.88, 119.90, 116.94, 116.17, 111.41, 105.17. Anal. Calcd. For  $C_{18}H_{11}N_3$ : C, 80.28; H, 4.12; N, 15.60. Found: C, 80.29; H, 4.09; N, 15.62.

**6-(9H-carbazol-9-yl)nicotinamide (P24M).**

A mixture of 6-(9H-carbazol-9-yl)nicotinonitrile (0.4 g, 1.50 mmol), 30 %  $H_2O_2$  (1.25 g, 37.5 mmol),  $KOH$  (0.74 g, 18.5 mmol), and DMSO (30 mL) was stirred for 3 h at 40 °C. After cooling to room temperature, the mixture was extracted with dichloromethane. The combined organic layer was dried with anhydrous  $MgSO_4$ , and filtered and concentrated in vacuo. The crude product was purified by silica-gel column chromatography using dichloromethane as the eluent to give the compound as a white solid (0.4 g, yield 90 %).  $^1H$  NMR (500 MHz,  $DMSO-d_6$ ):  $\delta$  9.16 (d,  $J = 2.4$  Hz, 1H), 8.56–8.45 (m, 1H), 8.32–8.16 (m, 3H), 7.89 (dd,  $J = 9.8, 8.4$  Hz, 3H), 7.68 (s, 1H), 7.46 (ddd,  $J = 8.4, 7.1, 1.3$  Hz, 2H), 7.37–7.21 (m, 2H).  $^{13}C$  NMR (126 MHz,  $DMSO-d_6$ ):  $\delta$  165.74, 152.63, 148.83, 138.61, 138.49, 127.18, 126.50, 123.76, 121.36, 120.39, 117.93, 111.63. Anal. Calcd. For  $C_{18}H_{11}N_3O$ : C, 75.25; H, 4.56; N, 14.63. Found: C, 75.32; H, 4.49; N, 14.61.

**Scheme 4. The synthetic route of P25N and P25M.**

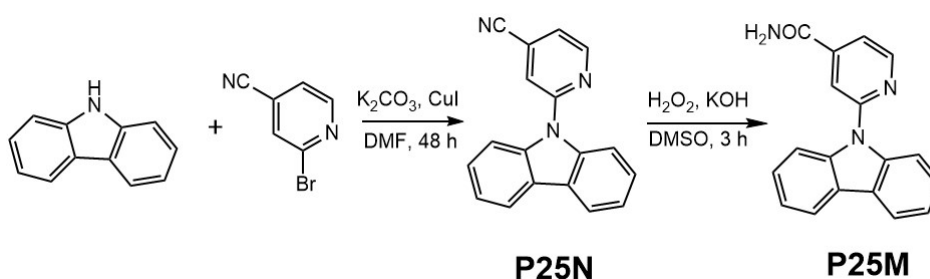

2-(9*H*-carbazol-9-yl)nicotinonitrile (P25N).

A mixture of K<sub>2</sub>CO<sub>3</sub> (0.75 g, 5.46 mmol), 9*H*-carbazole (0.91 g, 5.45 mmol), 2-bromo-4-fluoropyridine (1.0 g, 5.46 mmol) and 1,10-phenanthroline monohydrate (0.06 g, 0.55 mmol) in DMF (30 mL) was stirred at room temperature. CuI (0.4 g, 1.10 mmol) was added to the mixture and stirred at 128 °C for 48 h. After cooling to room temperature, the reaction mixture was extracted with dichloromethane. The combined organic layer was dried with anhydrous MgSO<sub>4</sub>, and filtered and concentrated in vacuo. The crude product was purified by silica-gel column chromatography using petroleum ether/dichloromethane (1:1, v/v), yielding a white solid (0.4 g, yield 25.2 %). <sup>1</sup>H NMR (500 MHz, Chloroform-*d*): δ 8.89 (d, *J* = 5.0 Hz, 1H), 8.12 (d, *J* = 7.7 Hz, 2H), 7.93–7.87 (m, 3H), 7.52–7.45 (m, 3H), 7.37 (t, *J* = 7.4 Hz, 2H). <sup>13</sup>C NMR (126 MHz, CDCl<sub>3</sub>): δ 152.84, 150.69, 138.86, 126.62, 124.84, 122.58, 121.99, 121.61, 120.39, 119.94, 116.12, 111.19. Anal. Calcd. For C<sub>18</sub>H<sub>11</sub>N<sub>3</sub>: C, 80.28; H, 4.12; N, 15.60. Found: C, 80.19; H, 4.02; N, 15.79.

2-(9*H*-carbazol-9-yl)isonicotinamide (P25M).

A mixture of 2-(9*H*-carbazol-9-yl)nicotinonitrile (0.4 g, 1.50 mmol), 30 % H<sub>2</sub>O<sub>2</sub> (1.25 g, 37.5 mmol), KOH (0.74 g, 18.5 mmol), and DMSO (30 mL) was stirred for 3 h at 40 °C. After cooling to room temperature, the mixture was extracted with dichloromethane. The combined organic layer was dried with anhydrous MgSO<sub>4</sub>, and filtered and concentrated in vacuo. The crude product was purified by silica-gel column chromatography using dichloromethane as the eluent to give the compound as a white solid (0.4 g, yield 90 %). <sup>1</sup>H NMR (500 MHz, DMSO-*d*<sub>6</sub>): δ 8.84 (d, *J* = 5.1 Hz, 1H), 8.41 (s, 1H), 8.23 (d, *J* = 7.7 Hz, 2H), 8.12 (d, *J* = 1.3 Hz, 1H), 7.89 (s, 1H), 7.86–7.76 (m, 3H), 7.46 (ddd, *J* = 8.4, 7.0, 1.3 Hz, 2H), 7.32 (t, *J* = 7.5 Hz, 2H). <sup>13</sup>C NMR (126 MHz, DMSO-*d*<sub>6</sub>): δ 165.67, 151.41, 150.21, 144.68, 138.78, 126.45, 123.51, 121.12, 120.40, 119.55, 116.57, 111.27. Anal. Calcd. For C<sub>18</sub>H<sub>11</sub>N<sub>3</sub>O: C, 75.25; H, 4.56; N, 14.63. Found: C, 75.32; H, 4.49; N, 14.61.

## Supplementary Figures and Tables

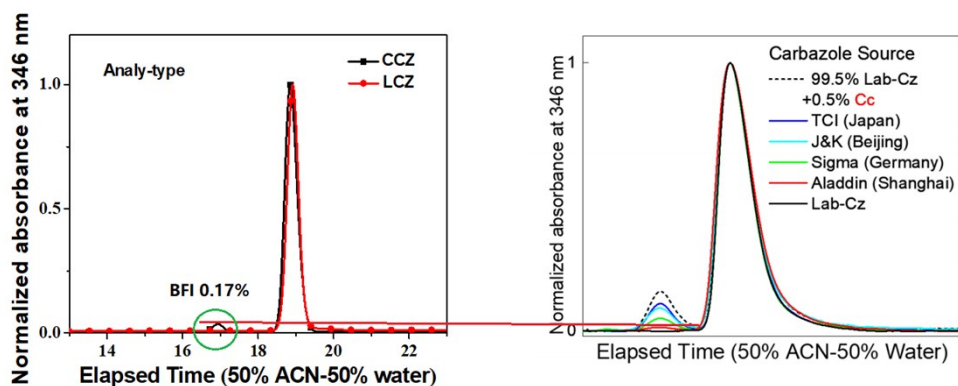

**Figure S1.** HPLC spectra of **CCZ** and **LCZ** monitored at the onset absorption of 346 nm with 50/50 acetonitrile (ACN)-water ratio (v/v). By comparing with Liu (right), the content of 1H-benzo[f]indole (BFI) in CCZ we used is about 0.17%.

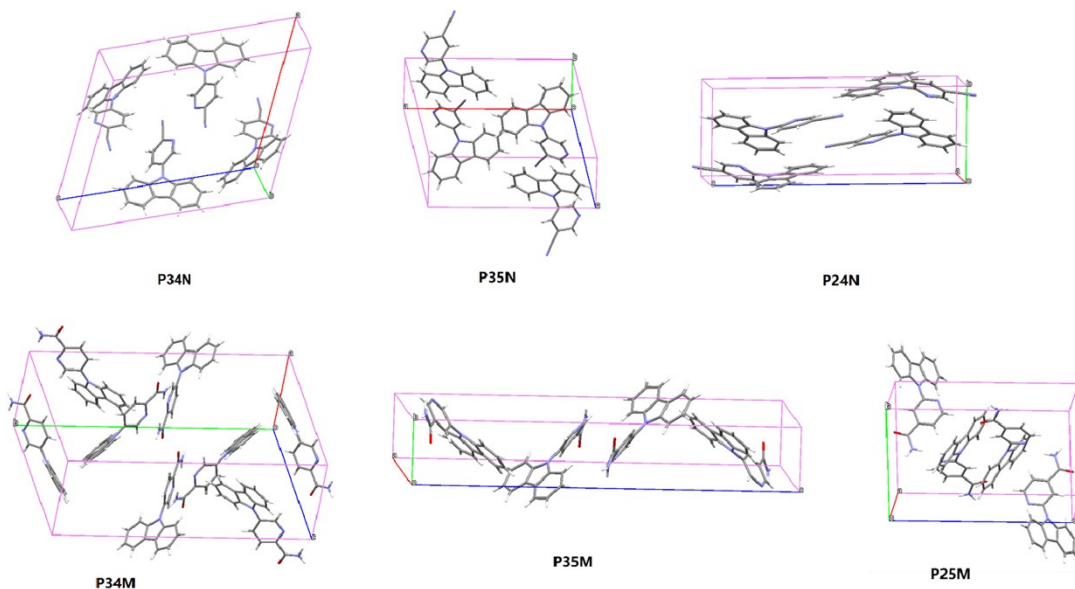

**Figure S2.** The RTP unit cell structures of **P35N**, **P34N**, **P24N**, **P35M**, **P34M** and **P25M** measured at room temperature under 365 nm excitation.

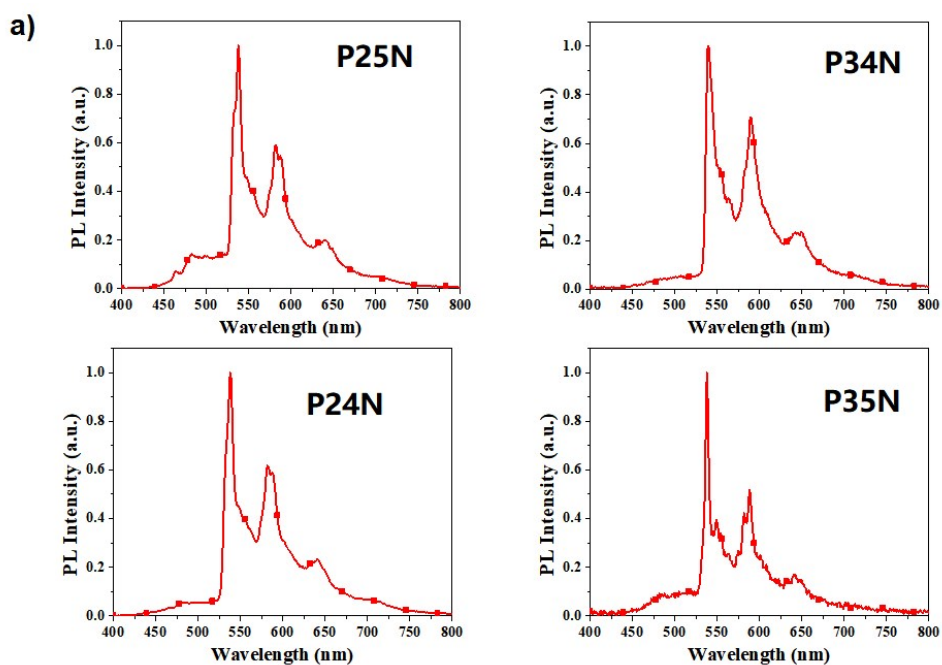

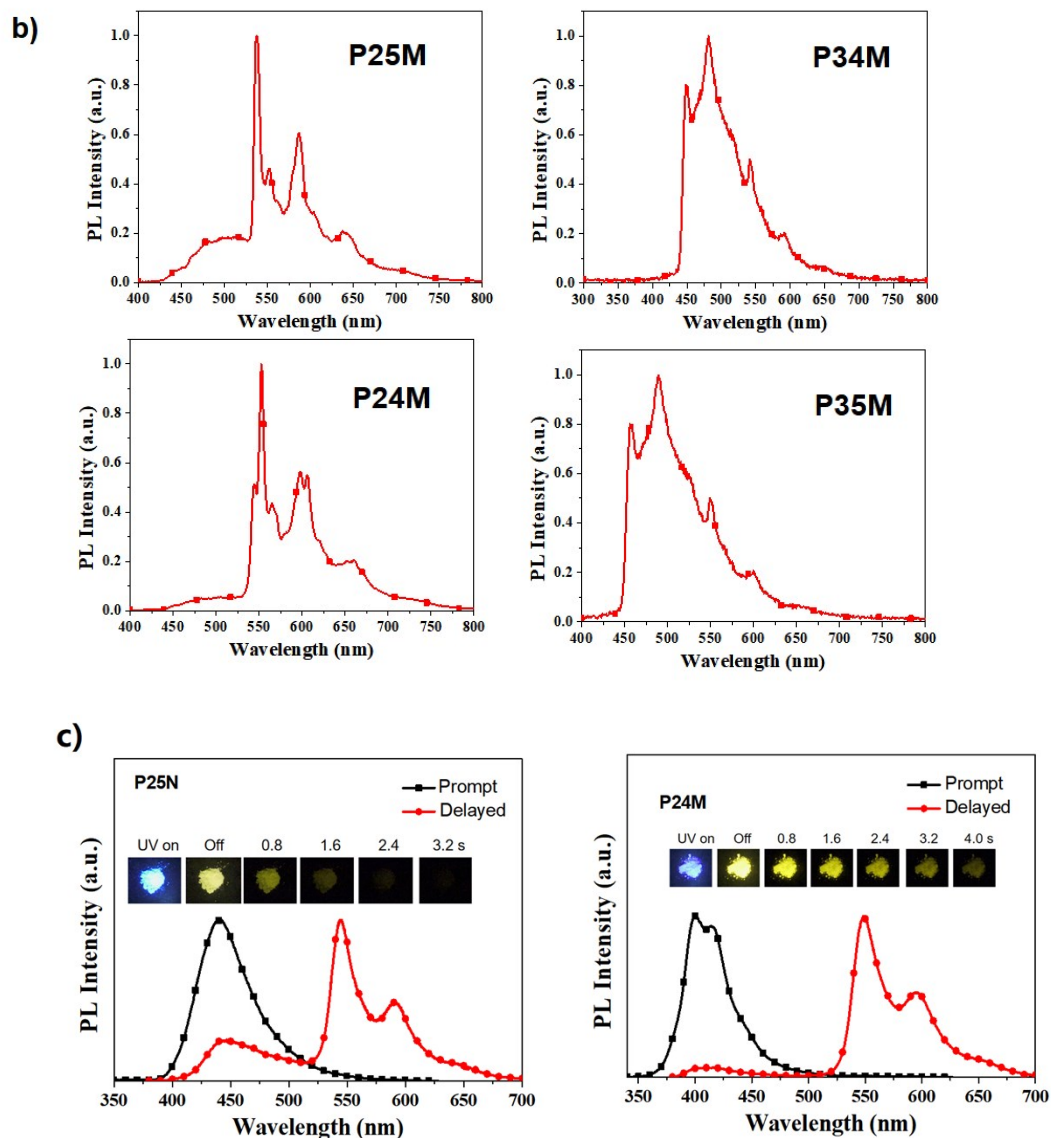

**Figure S3.** The prompt spectra of a) P25N, P34N, P24N, P35N; b) P25M, P34M, P24M, P35M at 78 K (in liquid nitrogen) under 365 nm excitation. c) The prompt and delayed spectra and photographs of P25N and P24M measured at room temperature under 365 nm excitation.

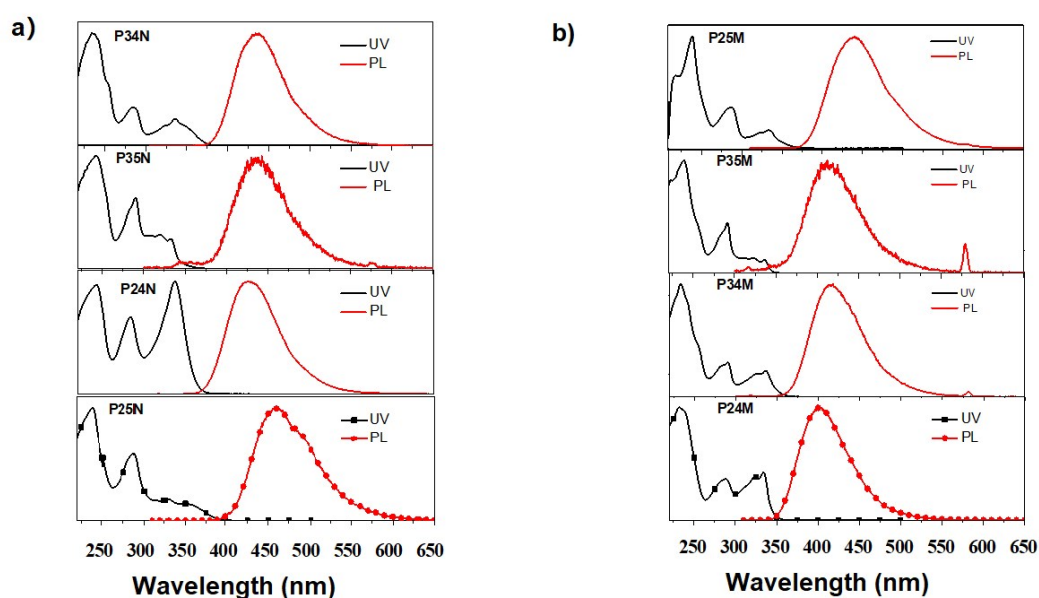

**Figure S4.** The absorption and photoluminescence spectra of a) P35N, P34N, P24N, P25N; b) P35M, P34M, P25M, P24M in THF solution.

| Compound | $\lambda_{ex}/nm$ | Emission (nm) | $\tau_1$ (ms)     | $\tau_2$ (ms)     | $\tau_3$ (ms)     | $\tau_4$ (ms)    | $\tau_a$ (ms) |
|----------|-------------------|---------------|-------------------|-------------------|-------------------|------------------|---------------|
| P35N     | 365               | 545           | 16.41<br>(2.56%)  | 195.0<br>(23.98%) | 528.3<br>(73.46%) |                  | 435.27        |
| P34N     |                   | 501           | 2.973<br>(55.65%) | 10.57<br>(24.80%) | 41.13<br>(14.00%) | 445.8<br>(5.55%) | 34.78         |
| P24N     |                   | 547           | 10.17<br>(2.27%)  | 706.8<br>(97.73%) |                   |                  | 690.99        |
| P25N     |                   | 545           | 12.17<br>(5.92%)  | 330.2<br>(94.08%) |                   |                  | 311.37        |
| P35M     |                   | 548           | 18.53<br>(0.74%)  | 861.2<br>(99.26%) |                   |                  | 854.96        |
| P34M     |                   | 549           | 5.998<br>(2.78%)  | 274.4<br>(10.53%) | 685.0<br>(86.69%) |                  | 622.89        |
| P24M     |                   | 549           | 185.8<br>(30.91%) | 871.8<br>(69.09%) |                   |                  | 659.76        |
| P25M     |                   | 547           | 1.66<br>(43.96%)  | 27.7<br>(20.95%)  | 467.4<br>(35.09%) |                  | 170.54        |

P34N EX360,  $\Phi_{total} = 45.6\%$ ,  $\Phi_p = 26.4\%$

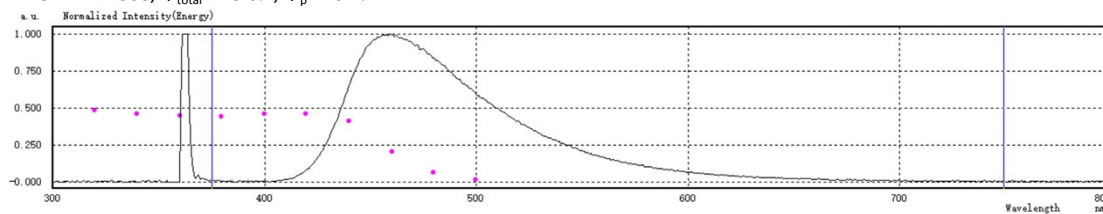

P35N EX360,  $\Phi_{total} = 4.3\%$ ,  $\Phi_p = 0.9\%$

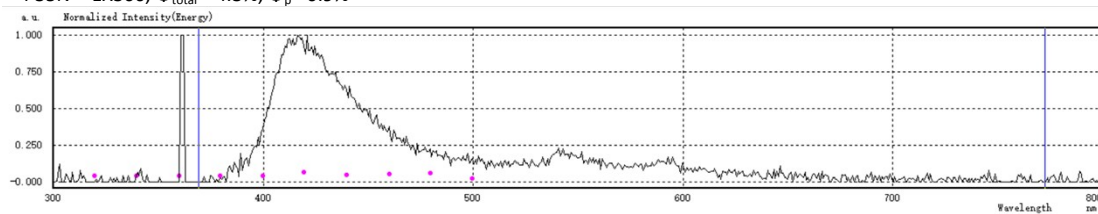

P24N EX360,  $\Phi_{total} = 51.3\%$ ,  $\Phi_p = 29.2\%$

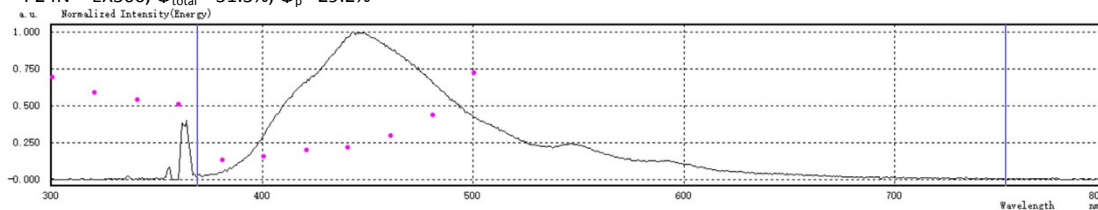

P25N EX360,  $\Phi_{total} = 26.0\%$ ,  $\Phi_p = 9.9\%$

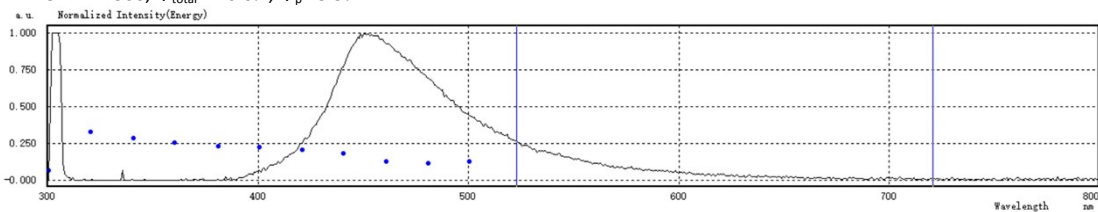

P35M EX360,  $\Phi_{total} = 7.7\%$ ,  $\Phi_p = 0.8\%$

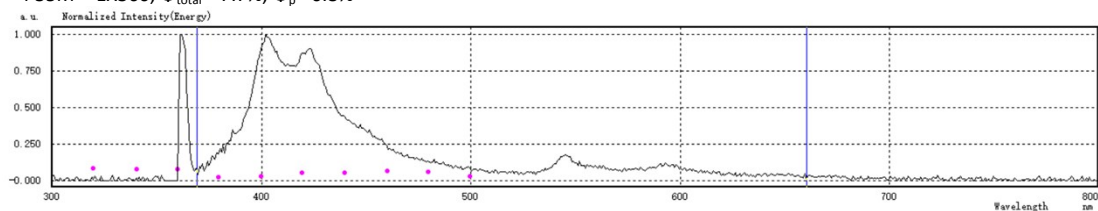

P34M EX360,  $\Phi_{\text{total}} = 48.3\%$ ,  $\Phi_p = 1.8\%$

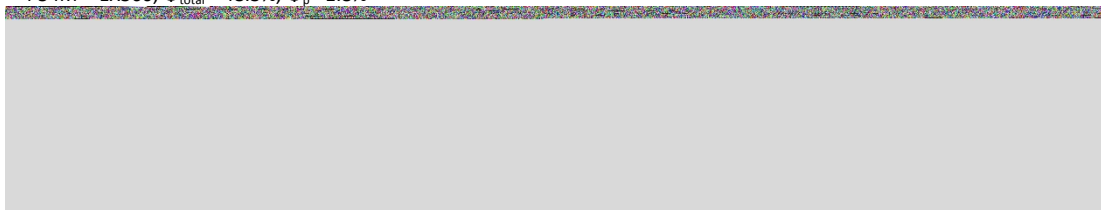

P24M EX360,  $\Phi_{\text{total}} = 52.3\%$ ,  $\Phi_p = 6.3\%$

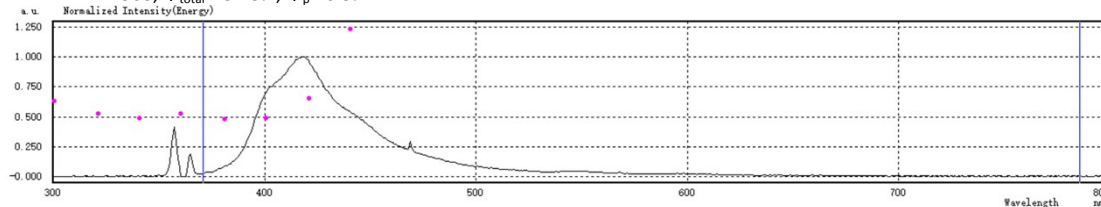

P25M EX360,  $\Phi_{\text{total}} = 23.7\%$ ,  $\Phi_p = 12.6\%$

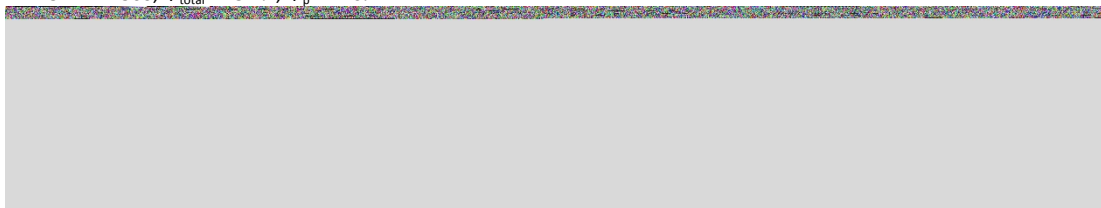

**Figure S5.** The RTP lifetimes, unit cell structures and quantum yield of **P35N**, **P34N**, **P24N**, **P25N**, **P35M**, **P34M**, **P24M** and **P25M** measured at room temperature under 365 nm excitation.

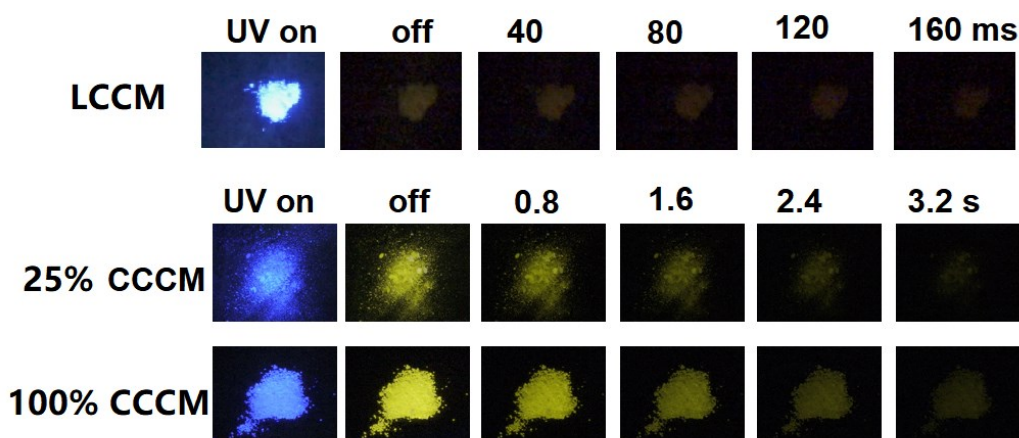

**Figure S6.** The low temperature phosphorescence photographs of CCZ and LCZ derivatives at 78 K (in liquid nitrogen) under 365 nm excitation.

**Table S1.** The crystal structural data of P34N, P24N, P35N, P25M, P34M and P35M.

| Compound reference | Colorless crystal <b>P34N</b> | Colorless crystal <b>P24N</b> | Colorless crystal <b>P35N</b> | Colorless crystal <b>P25M</b> | Colorless crystal <b>P34M</b> | Colorless crystal <b>P35M</b> |
|--------------------|-------------------------------|-------------------------------|-------------------------------|-------------------------------|-------------------------------|-------------------------------|
| Chemical formula   | $C_{18}H_{11}N_3$             | $C_{18}H_{11}N_3$             | $C_{18}H_{11}N_3$             | $C_{18}H_{13}N_3O$            | $C_{18}H_{13}N_3O$            | $C_{18}H_{13}N_3O$            |
| Formula weight     | 269.30                        | 269.30                        | 269.30                        | 287.31                        | 287.31                        | 287.31                        |
| Crystal system     | Monoclinic                    | Monoclinic                    | Monoclinic                    | Monoclinic                    | Monoclinic                    | Monoclinic                    |
| Space group        | P 21/c                        | P 21/n                        | P 21/c                        | P 21/n                        | P 21/c                        | P 21/n                        |
| a/ Å               | 18.140(14)                    | 9.034(3)                      | 15.379(9)                     | 8.543(8)                      | 7.8374(11)                    | 9.4696(11)                    |
| b/ Å               | 3.914(3)                      | 7.442(2)                      | 7.516(4)                      | 10.702(9)                     | 25.281(3)                     | 5.0807(6)                     |
| c/ Å               | 18.577(14)                    | 20.076(6)                     | 11.563(6)                     | 16.886(15)                    | 14.813(2)                     | 29.630(4)                     |
| $\alpha/^\circ$    | 90                            | 90                            | 90                            | 90                            | 90                            | 90                            |
| $\beta/^\circ$     | 95.169(16)                    | 99.057(6)                     | 100.885(9)                    | 91.104(17)                    | 102.932(3)                    | 96.439(2)                     |
| $\gamma/^\circ$    | 90                            | 90                            | 90                            | 90                            | 90                            | 90                            |



|                                                |                                                 |                                                   |                                                 |                                                   |                                                   |                                                   |
|------------------------------------------------|-------------------------------------------------|---------------------------------------------------|-------------------------------------------------|---------------------------------------------------|---------------------------------------------------|---------------------------------------------------|
| Unit cell volume/<br>Å <sup>3</sup>            | 1313.6(17)                                      | 1332.9(7)                                         | 1312.5(12)                                      | 1544(2)                                           | 2860.6(7)                                         | 1416.6(3)                                         |
| Temperature/K                                  | 100                                             | 100                                               | 100                                             | 100                                               | 100                                               | 100                                               |
| Z                                              | 4                                               | 4                                                 | 4                                               | 4                                                 | 4                                                 | 4                                                 |
| Density<br>(calculated) /g<br>cm <sup>-3</sup> | 1.362                                           | 1.342                                             | 1.363                                           | 1.236                                             | 1.334                                             | 1.347                                             |
| F(000)                                         | 560                                             | 560                                               | 560                                             | 600                                               | 1200                                              | 600                                               |
| Theta range for<br>data collection             | 2.562 to 24.997<br>deg.                         | 2.647 to 24.992<br>deg.                           | 3.028 to 24.994<br>deg.                         | 2.652 to 27.561<br>deg.                           | 2.666 to 24.998<br>deg.                           | 2.767 to 24.996<br>deg.                           |
| Index ranges                                   | -21<=h<=20,<br>-4<=k<=4,<br>-15<=l<=22          | -10<=h<=10,<br>-8<=k<=7,<br>23<=l<=22             | -16<=h<=18,<br>-8<=k<=8,<br>13<=l<=7            | -10<=h<=9,<br>-12<=k<=13,<br>21<=l<=21            | -9<=h<=9,<br>-30<=k<=16,<br>-17<=l<=17            | -10<=h<=11,<br>-6<=k<=6,<br>-27<=l<=35            |
| Completeness to<br>theta                       | 25.242 99.8%                                    | 24.992 99.9%                                      | 24.994 99.4%                                    | 25.242 95.3%                                      | 24.988 99.7%                                      | 24.996 99.4%                                      |
| Absorption<br>coefficient                      | None                                            | None                                              | None                                            | None                                              | None                                              | None                                              |
| Refinement<br>method                           | Full-matrix least-<br>squares on F <sup>2</sup> | Full-matrix<br>least-squares<br>on F <sup>2</sup> | Full-matrix least-<br>squares on F <sup>2</sup> | Full-matrix<br>least-squares<br>on F <sup>2</sup> | Full-matrix<br>least-squares<br>on F <sup>2</sup> | Full-matrix<br>least-squares<br>on F <sup>2</sup> |
| Data / restraints<br>/ parameters              | 2302 / 24 / 201                                 | 2342 / 0 / 191                                    | 2298 / 0 / 198                                  | 3394 / 0 / 200                                    | 5035 / 0 / 397                                    | 2489 / 0 / 199                                    |
| Goodness-of-fit<br>on F <sup>2</sup>           | 1.112                                           | 0.991                                             | 1.017                                           | 0.971                                             | 0.782                                             | 0.993                                             |
| CCDC number                                    | 2046606                                         | 2056175                                           | 2046603                                         | 2056176                                           | 2046605                                           | 2053954                                           |

## NMR Spectra

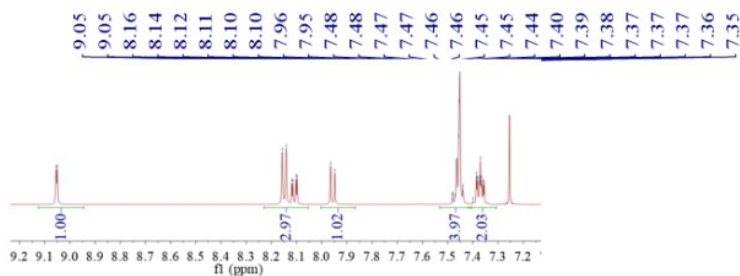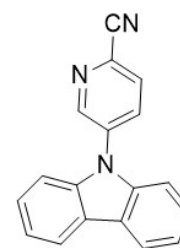

**P34N**

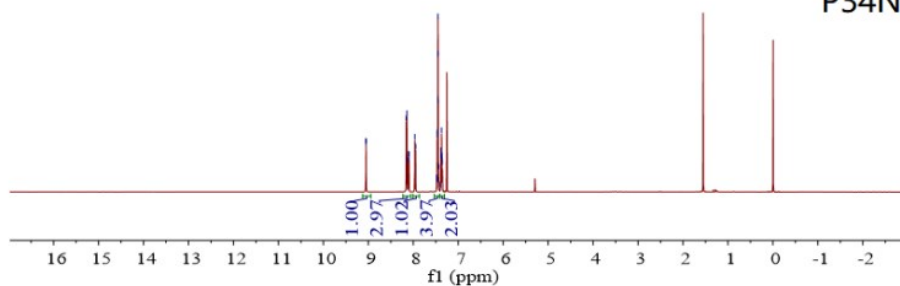

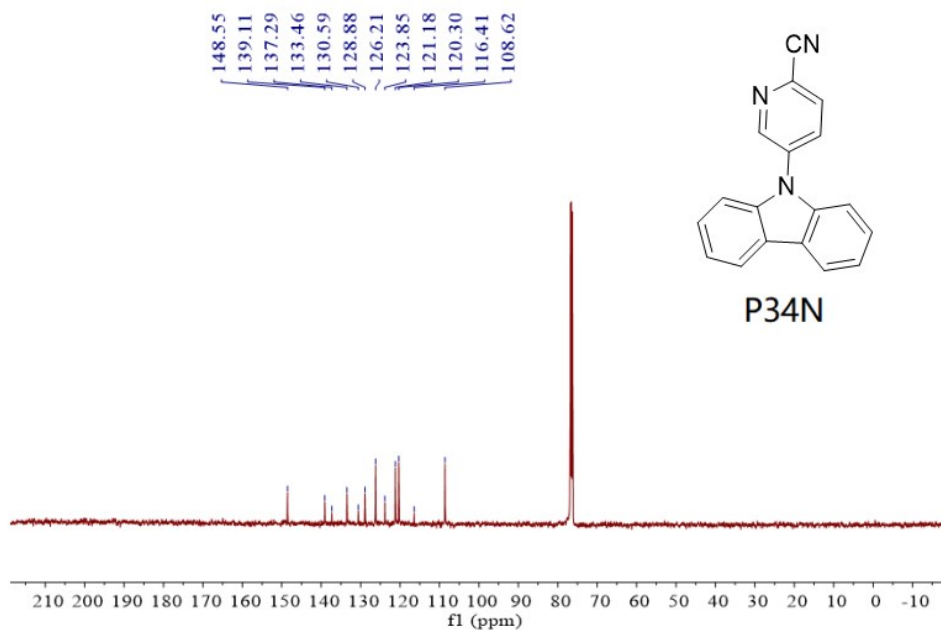

Figure S7. <sup>1</sup>H NMR and <sup>13</sup>C NMR spectra of P34N in CDCl<sub>3</sub>.

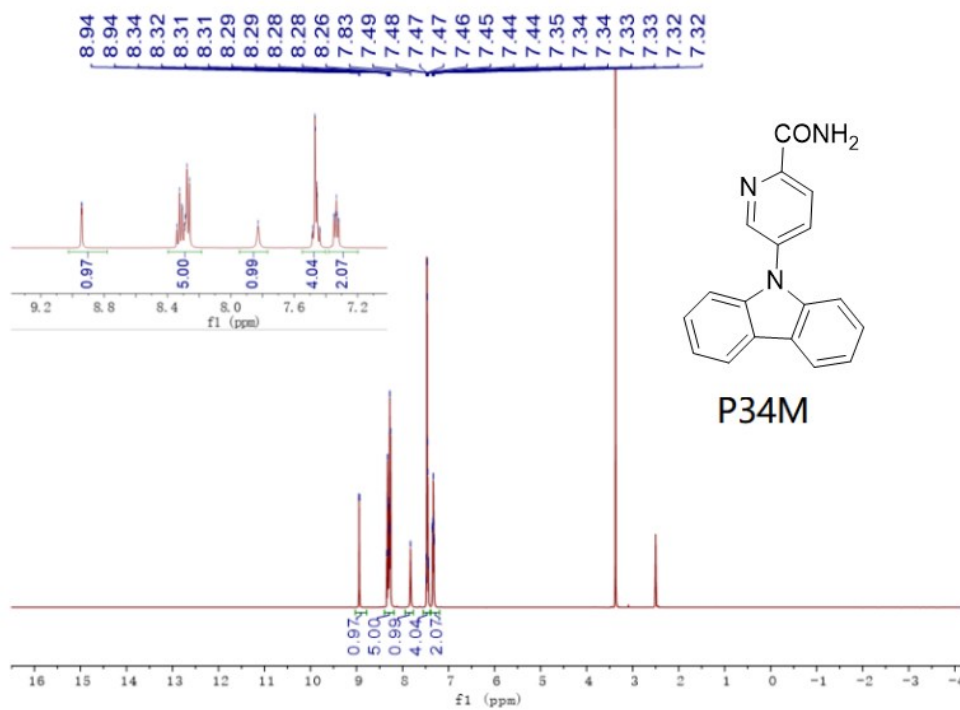

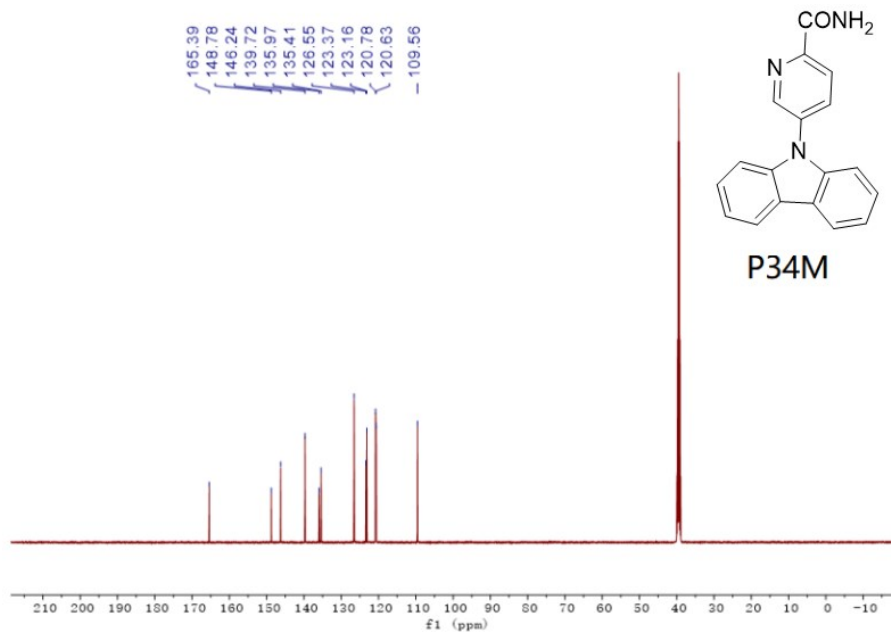

Figure S8.  $^1\text{H}$  NMR and  $^{13}\text{C}$  NMR spectra of P34M in  $\text{DMSO-d}_6$ .

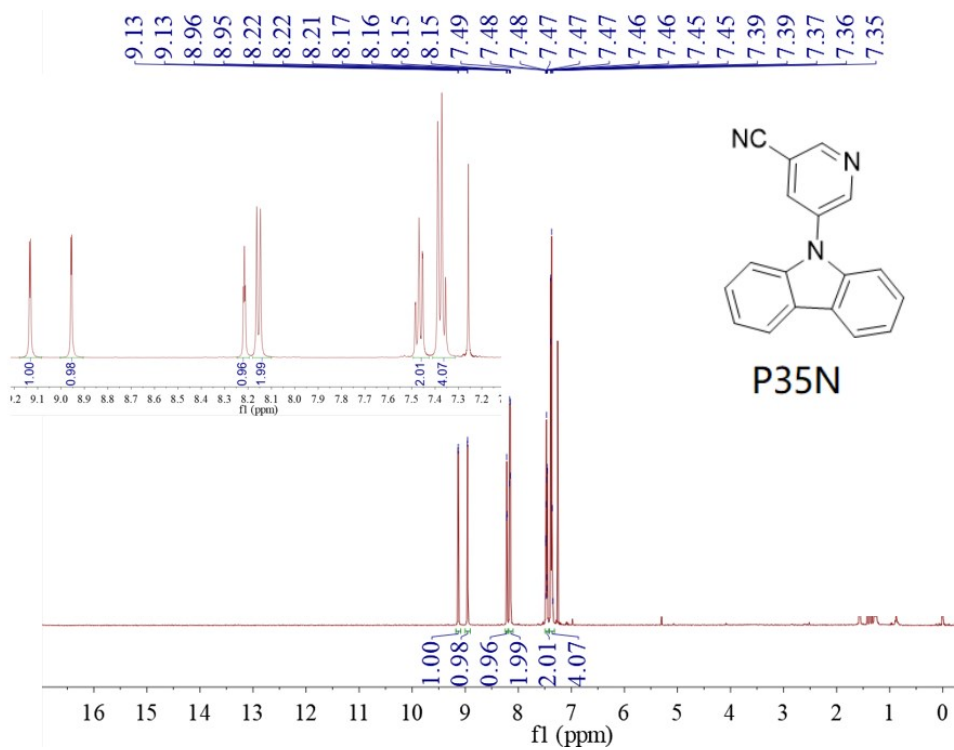

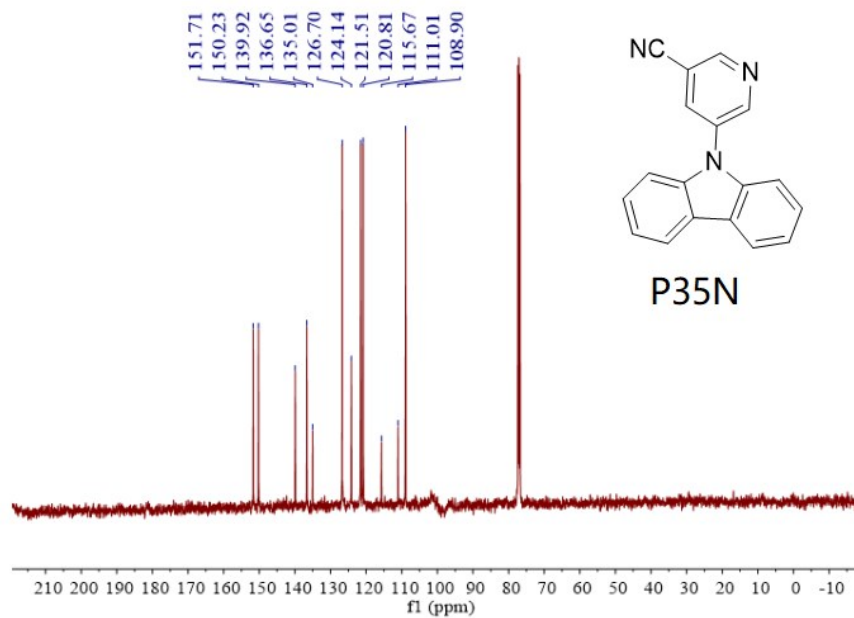

Figure S9.  $^1\text{H}$  NMR and  $^{13}\text{C}$  NMR spectra of P35N in  $\text{CDCl}_3$ .

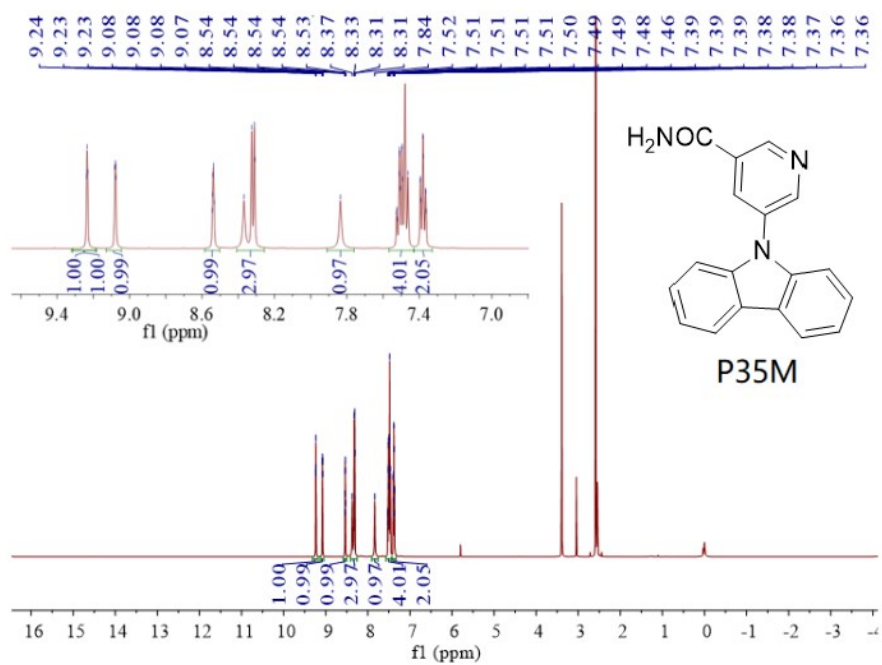

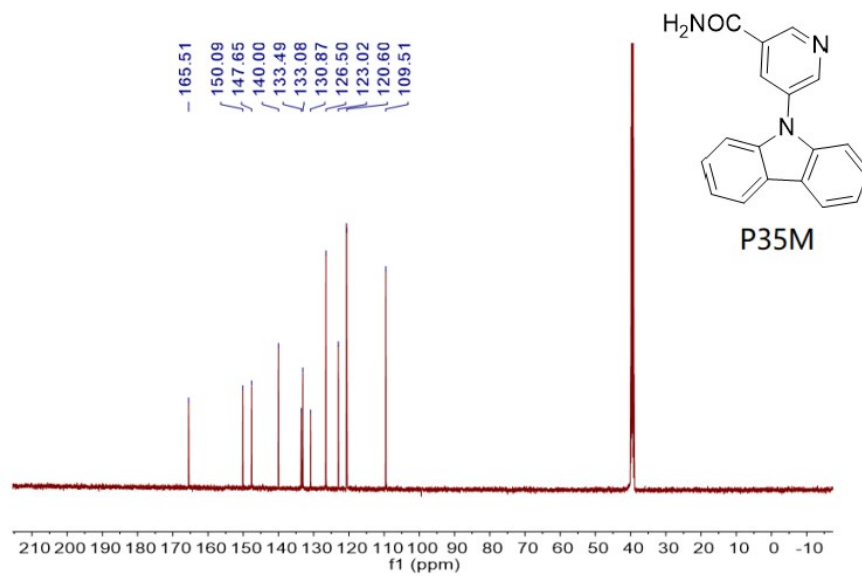

Figure S10.  $^1\text{H}$  NMR and  $^{13}\text{C}$  NMR spectra of P35M in  $\text{DMSO-}d_6$ .

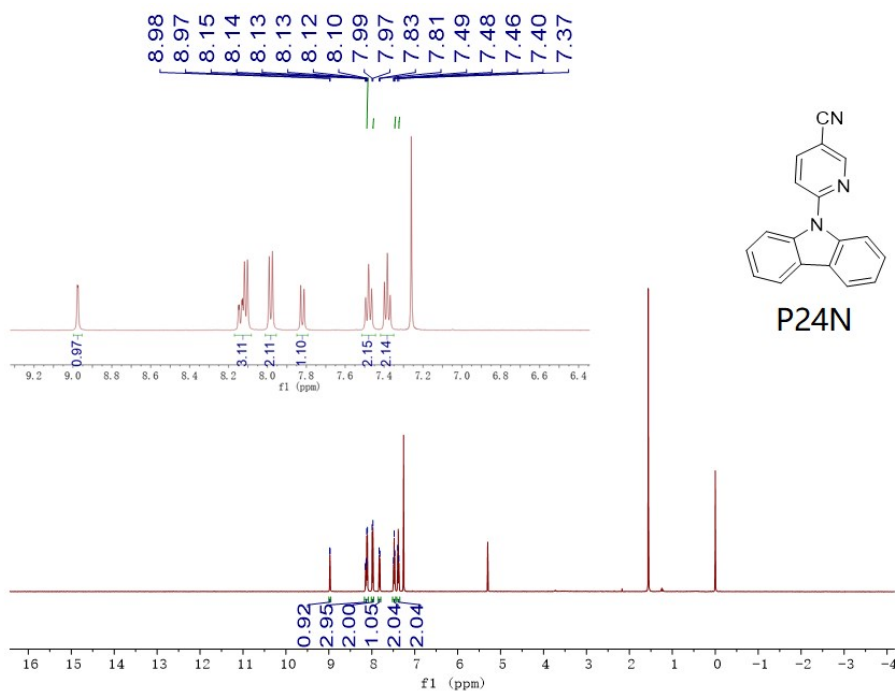

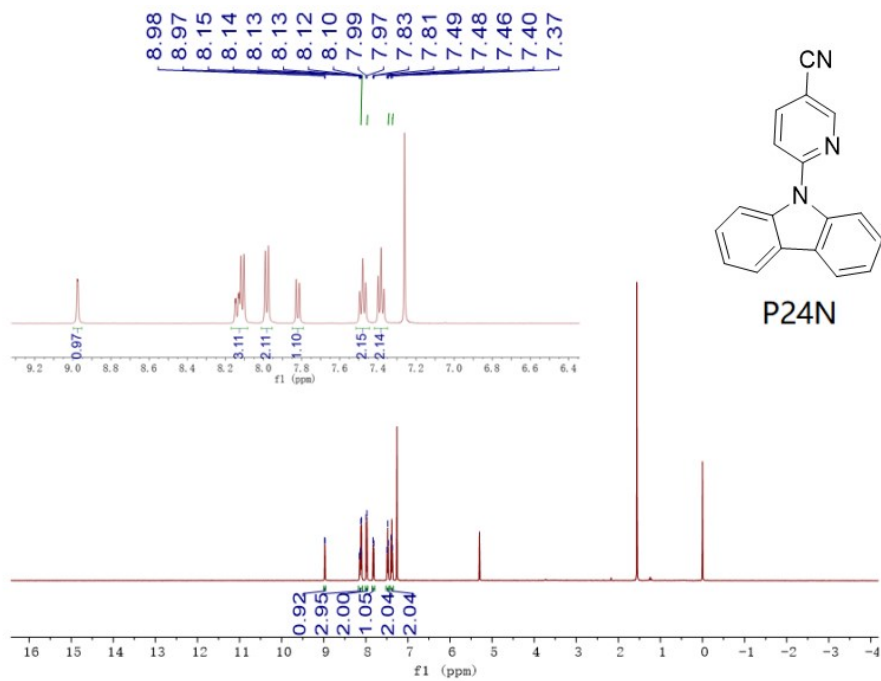

Figure S11. <sup>1</sup>H NMR and <sup>13</sup>C NMR spectra of **P24N** in CDCl<sub>3</sub>.

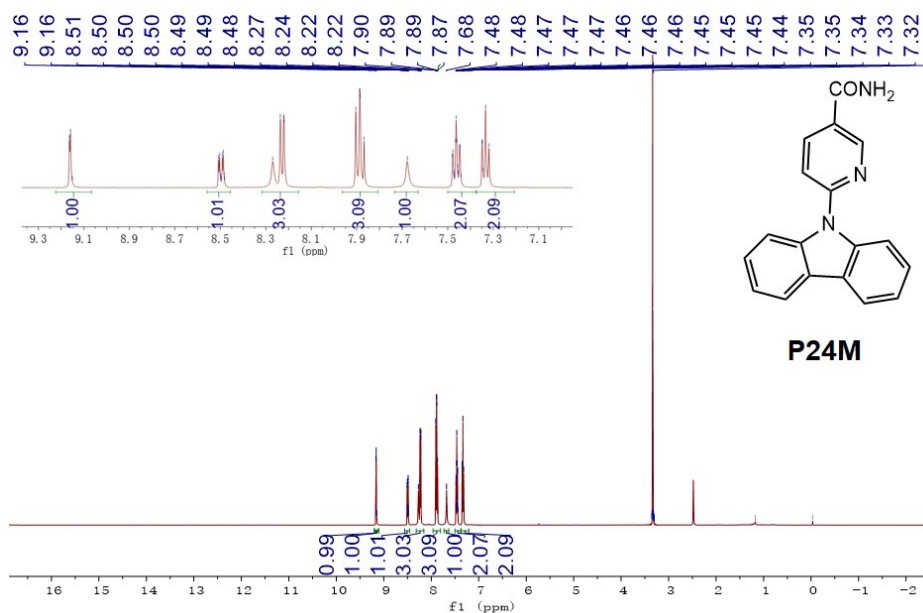

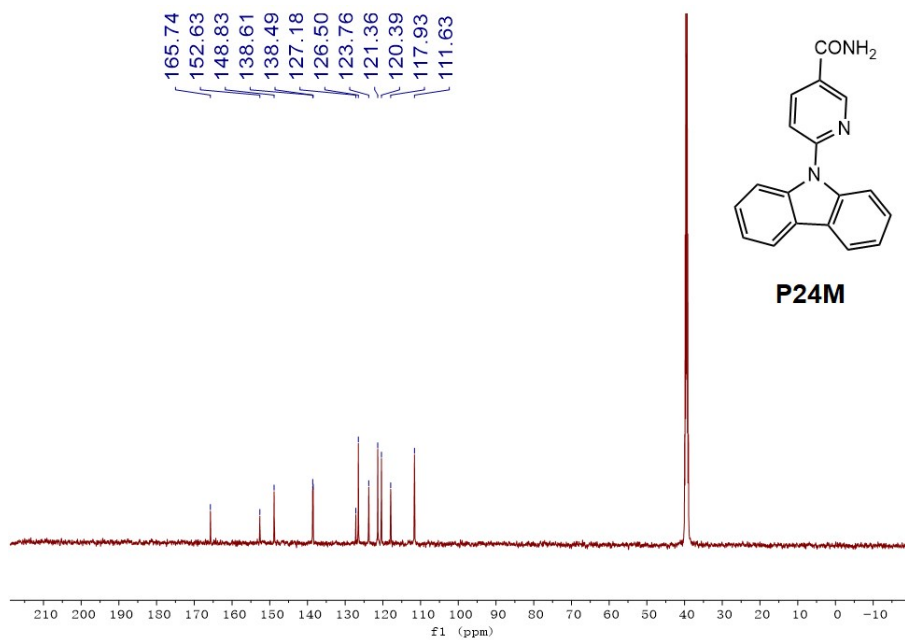

Figure S12. <sup>1</sup>H NMR and <sup>13</sup>C NMR spectra of P24M in DMSO-*d*<sub>6</sub>.

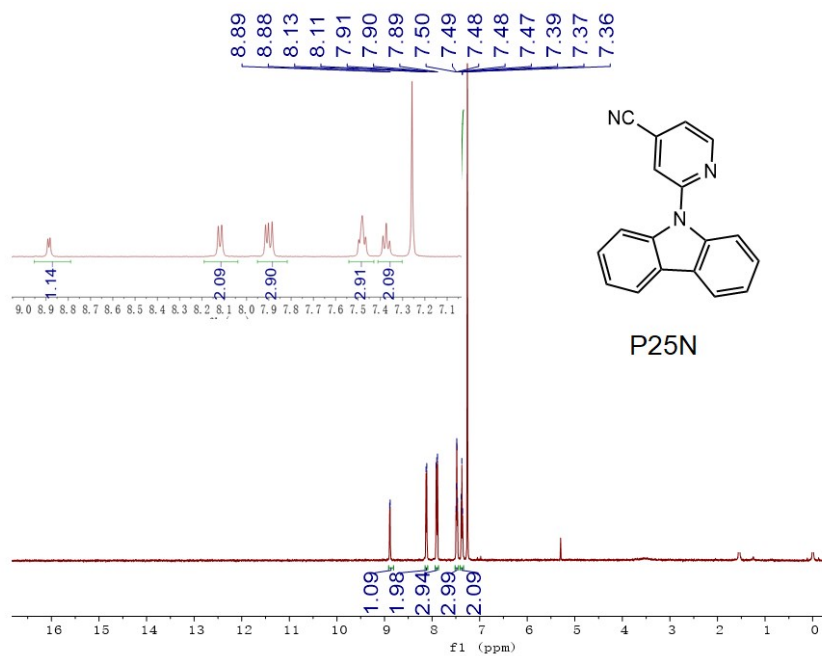

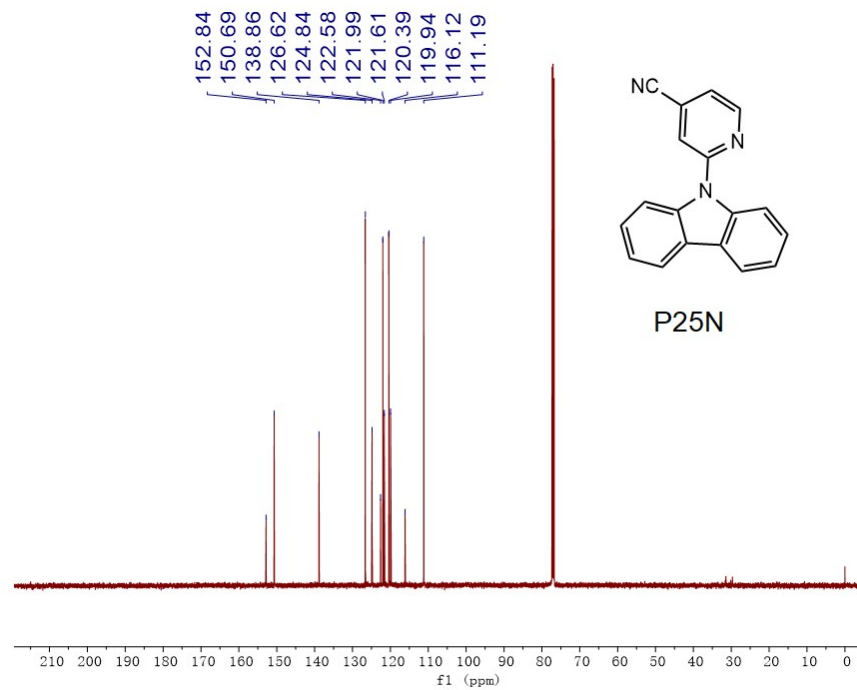

Figure S13.  $^1\text{H}$  NMR and  $^{13}\text{C}$  NMR spectra of **P25N** in  $\text{CDCl}_3$ .

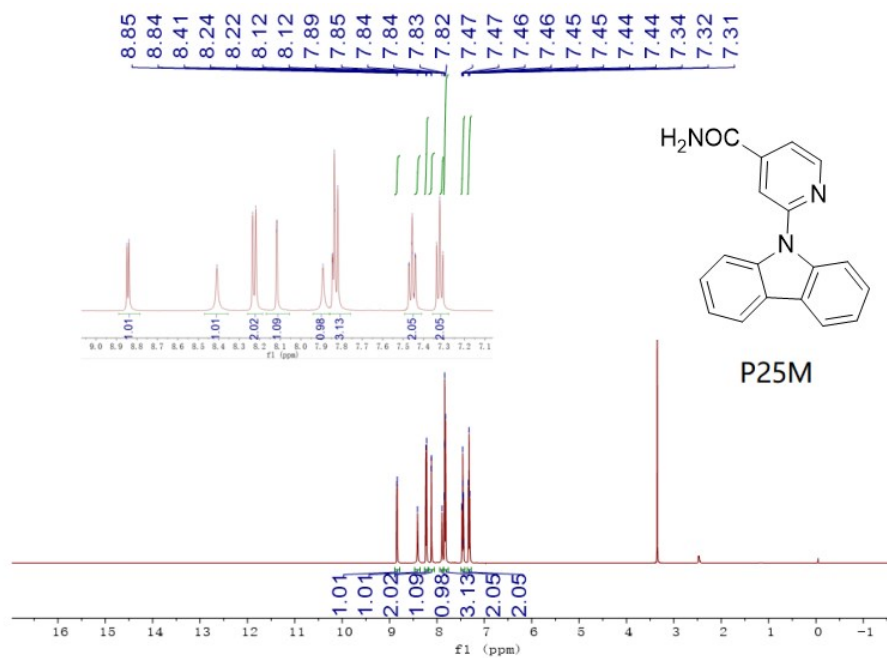



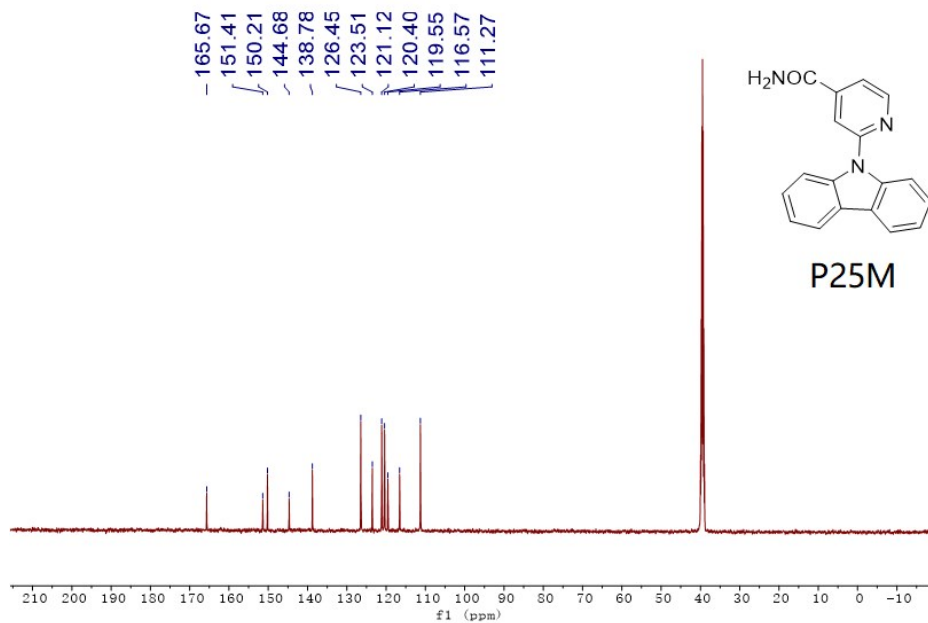

Figure S14.  $^1\text{H}$  NMR and  $^{13}\text{C}$  NMR spectra of P25M in  $\text{DMSO-}d_6$ .
